# Supplementary material for: The Impact of Pain, Threat Perception, and Emotional Distress on Suicide Risk in Individuals with Colorectal Cancer
Source: Preprints.org preprint supplement (doi:10.20944/preprints202407.0553.v1), 2024-07-05
Supplement: Supplementary file 1 [file supplementary]

## Sheet: Mini database
EDAD	SEXO	Diagnóstico	ESTADIO	IPQ_T	SUICIDIO	RECO_Malestaremocional
65	0	2	7	8	2	1
62	0	2	6	27	2	1
65	0	5	1	8	4	#NULL!
32	0	4	#NULL!	67	6	2
62	0	5	1	37	1	1
68	0	5	1	17	2	1
52	0	8	#NULL!	26	6	1
68	0	1	2	33	0	1
69	0	5	2	14	2	1
83	0	2	1	42	1	1
85	0	1	1	22	1	1
73	0	5	1	35	2	1
66	0	5	2	42	1	1
61	0	5	#NULL!	41	1	1
54	0	5	6	28	1	1
69	0	1	2	42	3	1
34	0	2	6	28	0	1
37	0	1	6	25	0	1
35	0	2	2	32	4	1
63	0	2	1	27	1	1
64	0	2	5	36	5	1
70	0	1	1	25	1	1
44	0	9	#NULL!	#NULL!	7	1
75	0	1	2	#NULL!	#NULL!	#NULL!
69	0	1	6	25	3	1
61	0	5	#NULL!	26	2	1
65	0	1	2	21	1	1
45	0	1	6	39	5	1
72	0	5	6	#NULL!	0	1
73	0	5	2	19	2	1
74	0	5	3	66	5	1
73	0	5	#NULL!	#NULL!	0	1
67	0	1	2	#NULL!	4	1
59	0	1	2	26	1	1
63	0	1	3	42	2	1
54	0	1	8	48	7	2
69	0	5	7	26	1	1
64	0	5	6	34	5	1
76	0	1	2	33	3	1
70	0	5	2	39	0	1
35	0	2	7	54	1	1
74	0	3	2	31	3	1
68	0	2	6	0	0	1
57	0	6	8	21	1	1
58	0	2	7	18	3	1
65	0	1	6	32	6	1
65	0	7	#NULL!	47	2	1
57	0	2	2	41	0	1
78	0	1	8	#NULL!	7	2
55	0	2	5	50	7	1
68	0	1	1	36	2	1
79	0	1	2	38	5	2
78	0	1	5	23	0	2
77	0	1	0	#NULL!	0	1
74	0	2	6	29	#NULL!	1
85	1	1	6	28	2	1
55	0	2	4	49	0	1
66	0	1	2	25	1	1
76	1	1	2	28	1	1
59	1	1	5	44	5	1
56	1	1	#NULL!	36	0	1
70	1	1	#NULL!	40	6	1
74	1	1	2	50	6	2
63	1	1	2	51	8	1
53	1	5	2	37	0	1
76	0	1	1	29	1	1
60	1	1	2	4	#NULL!	1
62	1	1	2	27	#NULL!	1
61	0	10	#NULL!	#NULL!	1	1
88	1	1	2	53	6	1
63	1	1	#NULL!	29	3	2
27	1	1	1	54	9	2
61	1	2	2	#NULL!	6	1
76	0	1	2	34	4	2
72	0	2	2	56	8	2
67	1	1	1	32	0	1
71	1	2	6	58	1	1
74	1	1	2	#NULL!	3	1
#NULL!	#NULL!	10	3	#NULL!	#NULL!	#NULL!
#NULL!	#NULL!	1	#NULL!	#NULL!	#NULL!	#NULL!
#NULL!	#NULL!	5	2	#NULL!	#NULL!	#NULL!
#NULL!	#NULL!	10	3	#NULL!	#NULL!	#NULL!
#NULL!	#NULL!	1	2	#NULL!	#NULL!	#NULL!
#NULL!	#NULL!	5	2	#NULL!	#NULL!	#NULL!
#NULL!	#NULL!	1	#NULL!	#NULL!	#NULL!	#NULL!
#NULL!	#NULL!	2	6	#NULL!	#NULL!	#NULL!
#NULL!	#NULL!	1	6	#NULL!	#NULL!	#NULL!
#NULL!	#NULL!	1	1	#NULL!	#NULL!	#NULL!
